# Supplementary material for: Neural activity related to volitional regulation of cortical excitability
Source: eLife journal article supplement (doi:10.7554/elife.40843), 2018-11-29
Supplement: supp [file elife_poa_e40843_Figure_1_figure_supplement_1.pdf › elife_poa_e40843_Figure_1_figure_supplement_1.pdf]

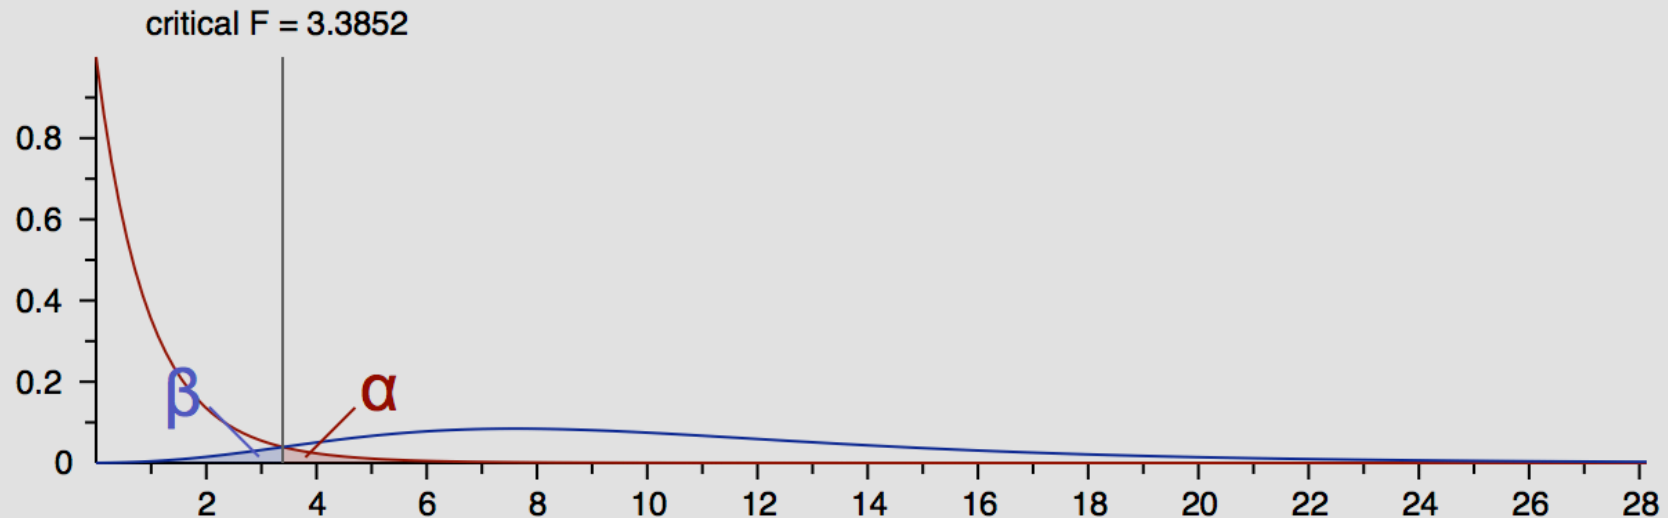

Test family

F tests

Statistical test

ANCOVA: Fixed effects, main effects and interactions

Type of power analysis

A priori: Compute required sample size - given  $\alpha$ , power, and effect size

Input parameters

Determine

Effect size  $f$  0.81 $\alpha$  err prob 0.05Power ( $1-\beta$  err prob) 0.95

Numerator df 2

Number of groups 2

Number of covariates 0

Output parameters

Noncentrality parameter  $\lambda$  17.7147000

Critical F 3.3851900

Denominator df 25

Total sample size 27

Actual power 0.9525720
