# Supplementary figures and images for: Neural activity related to volitional regulation of cortical excitability
Source: eLife journal article supplement (doi:10.7554/elife.40843), 2018-11-29

A

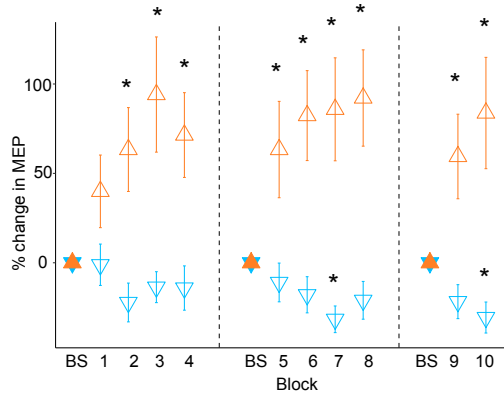

B

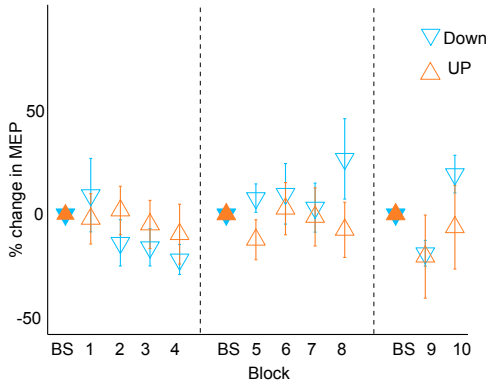

Supplement: supp [file elife_poa_e40843_Figure_2_figure_supplement_1.pdf › elife_poa_e40843_Figure_2_figure_supplement_1.pdf]

A

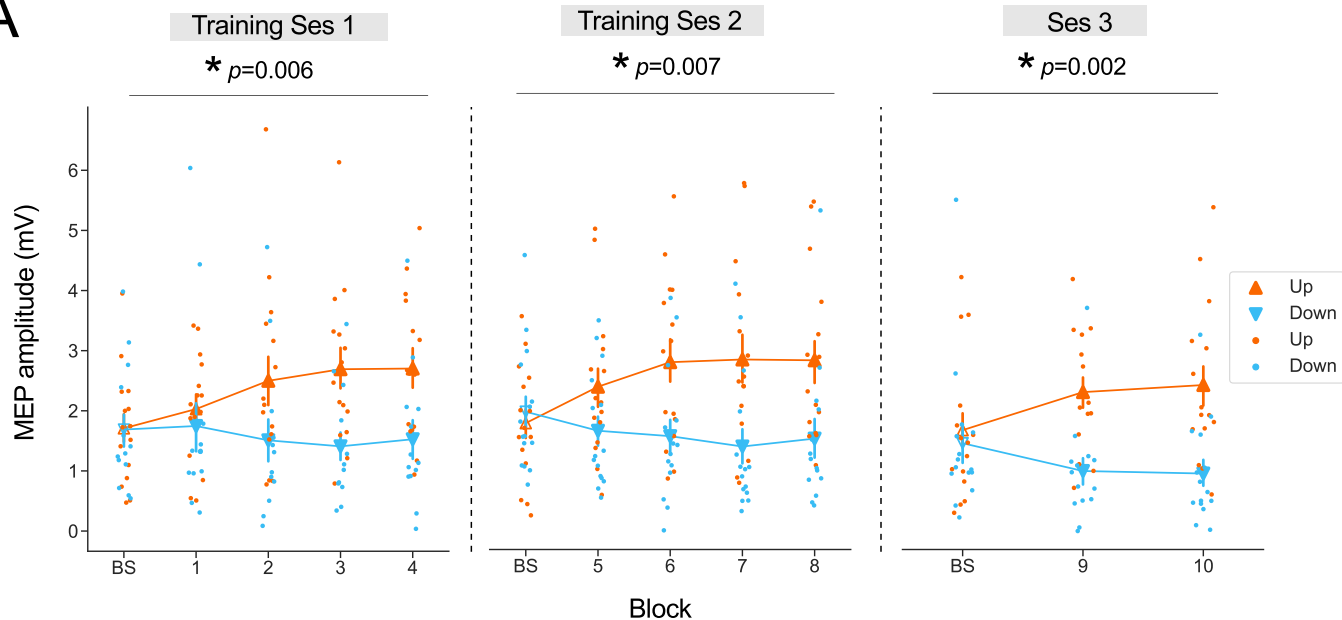

B

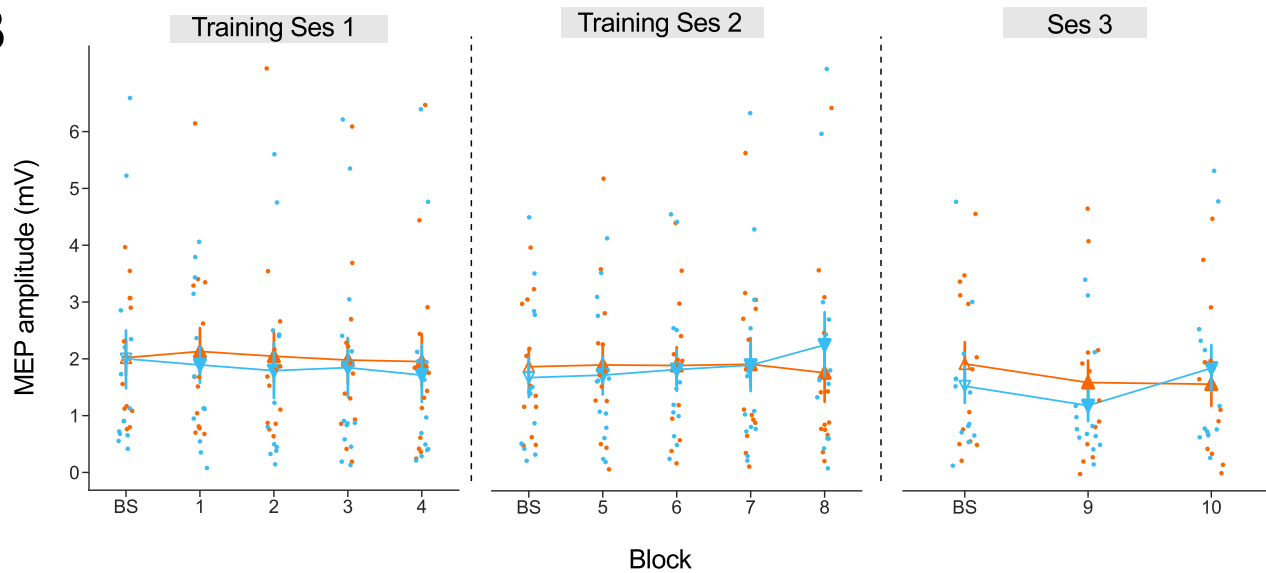

Supplement: supp [file elife_poa_e40843_Figure_2_figure_supplement_2.pdf › elife_poa_e40843_Figure_2_figure_supplement_2.pdf]

A

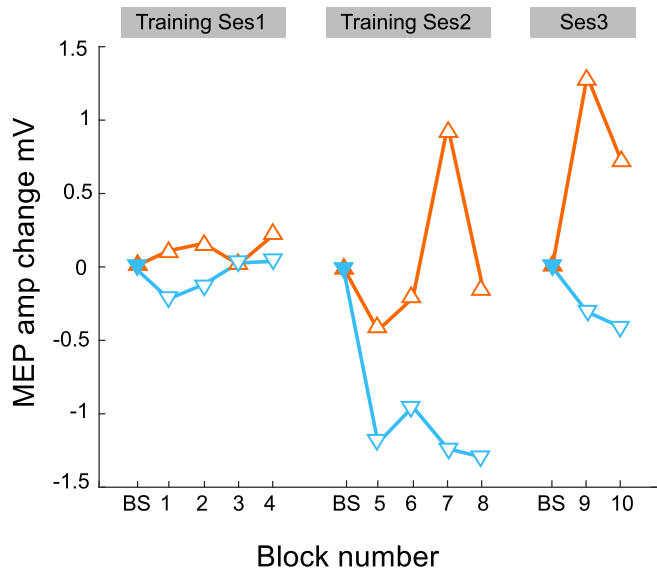

B

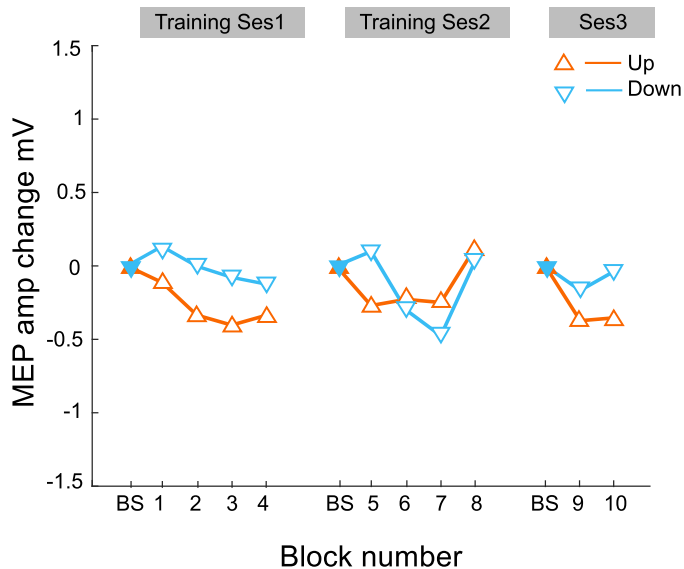

Supplement: supp [file elife_poa_e40843_Figure_2_figure_supplement_3.pdf › elife_poa_e40843_Figure_2_figure_supplement_3.pdf]

**A**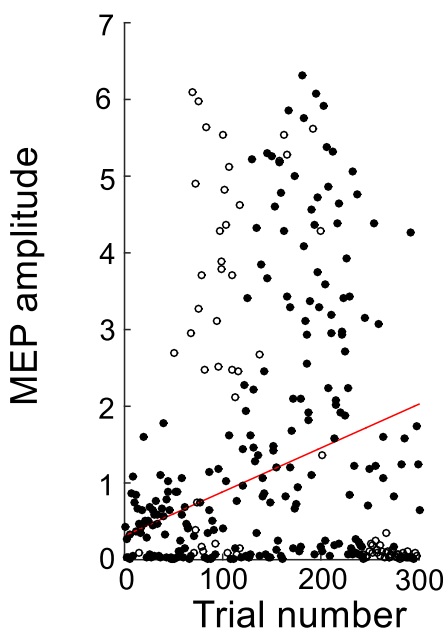**B**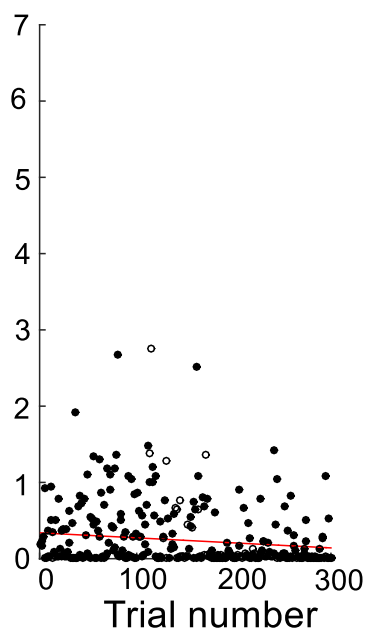**C**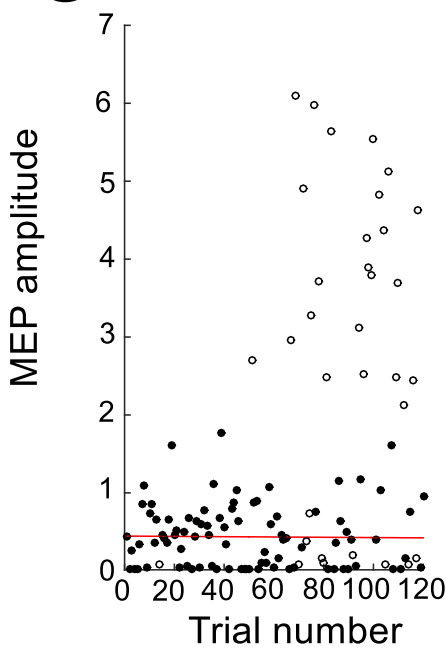**D**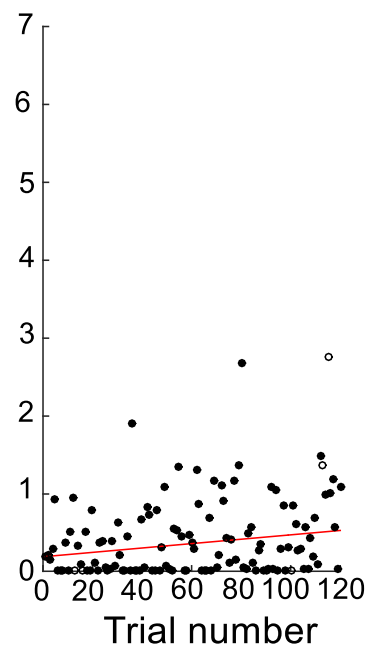**E**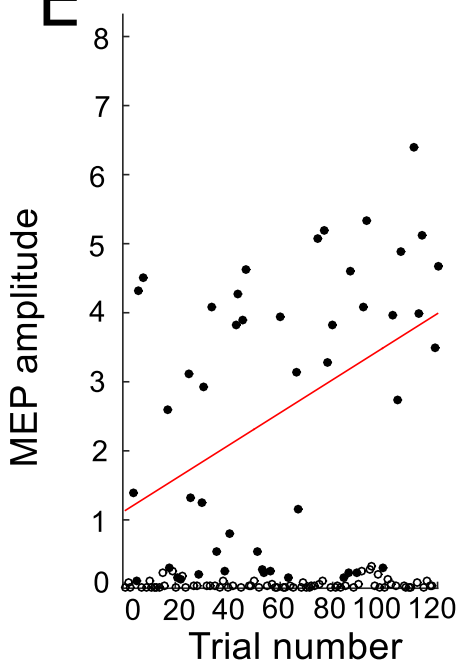**F**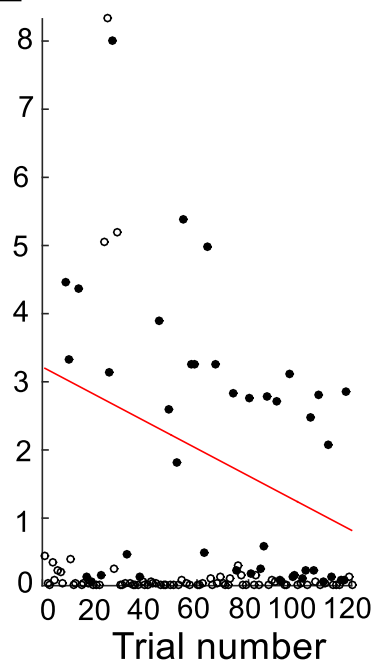

Supplement: supp [file elife_poa_e40843_Figure_2_figure_supplement_4.pdf › elife_poa_e40843_Figure_2_figure_supplement_4.pdf]

# Up-Down EEG

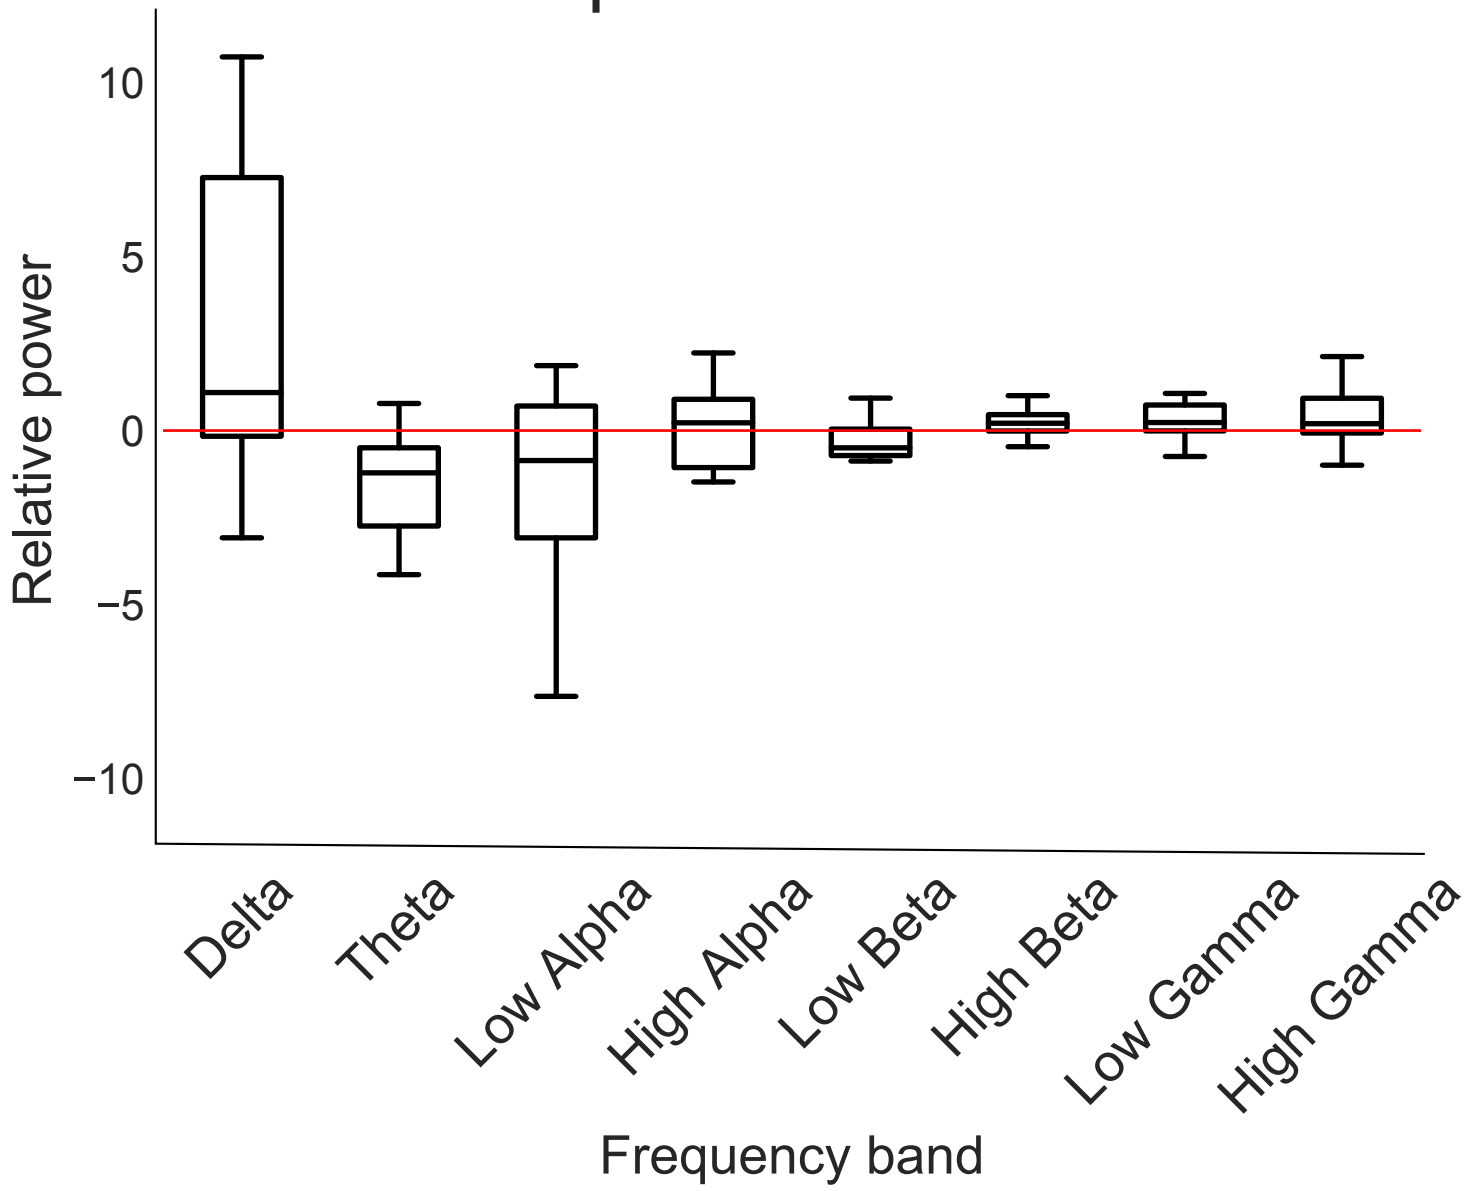

Supplement: supp [file elife_poa_e40843_Figure_5_figure_supplement_1.pdf › elife_poa_e40843_Figure_5_figure_supplement_1.pdf]

Delta

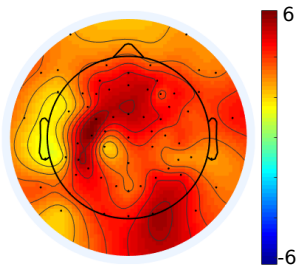

Low Beta

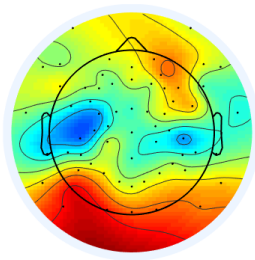

High Beta

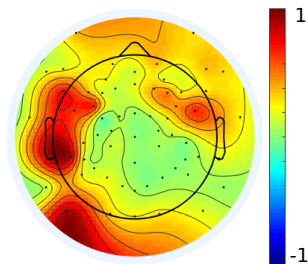

Supplement: supp [file elife_poa_e40843_Figure_5_figure_supplement_2.pdf › elife_poa_e40843_Figure_5_figure_supplement_2.pdf]

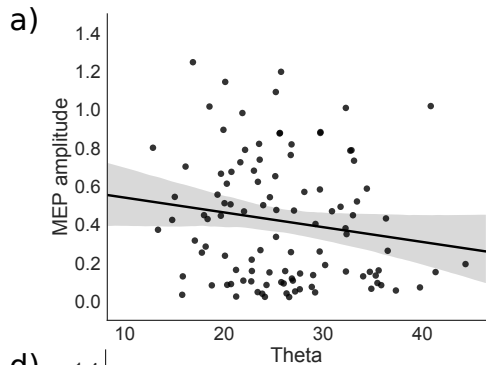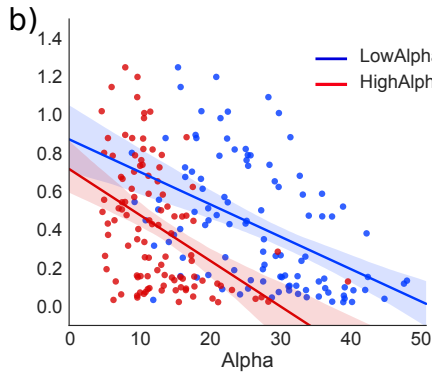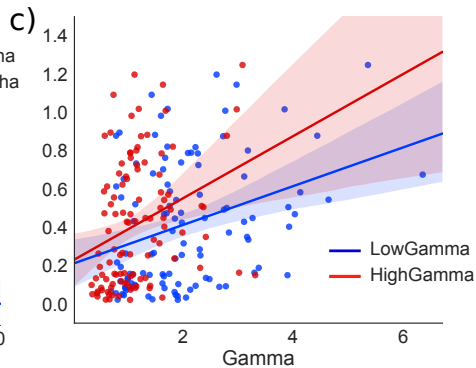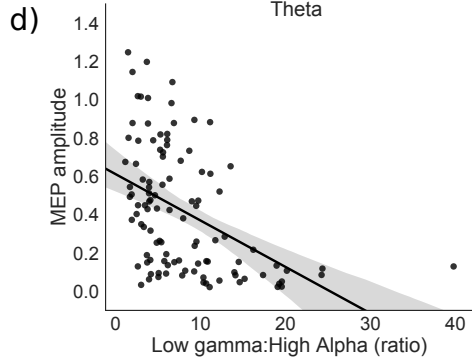

Supplement: supp [file elife_poa_e40843_Figure_5_figure_supplement_3.pdf › elife_poa_e40843_Figure_5_figure_supplement_3.pdf]

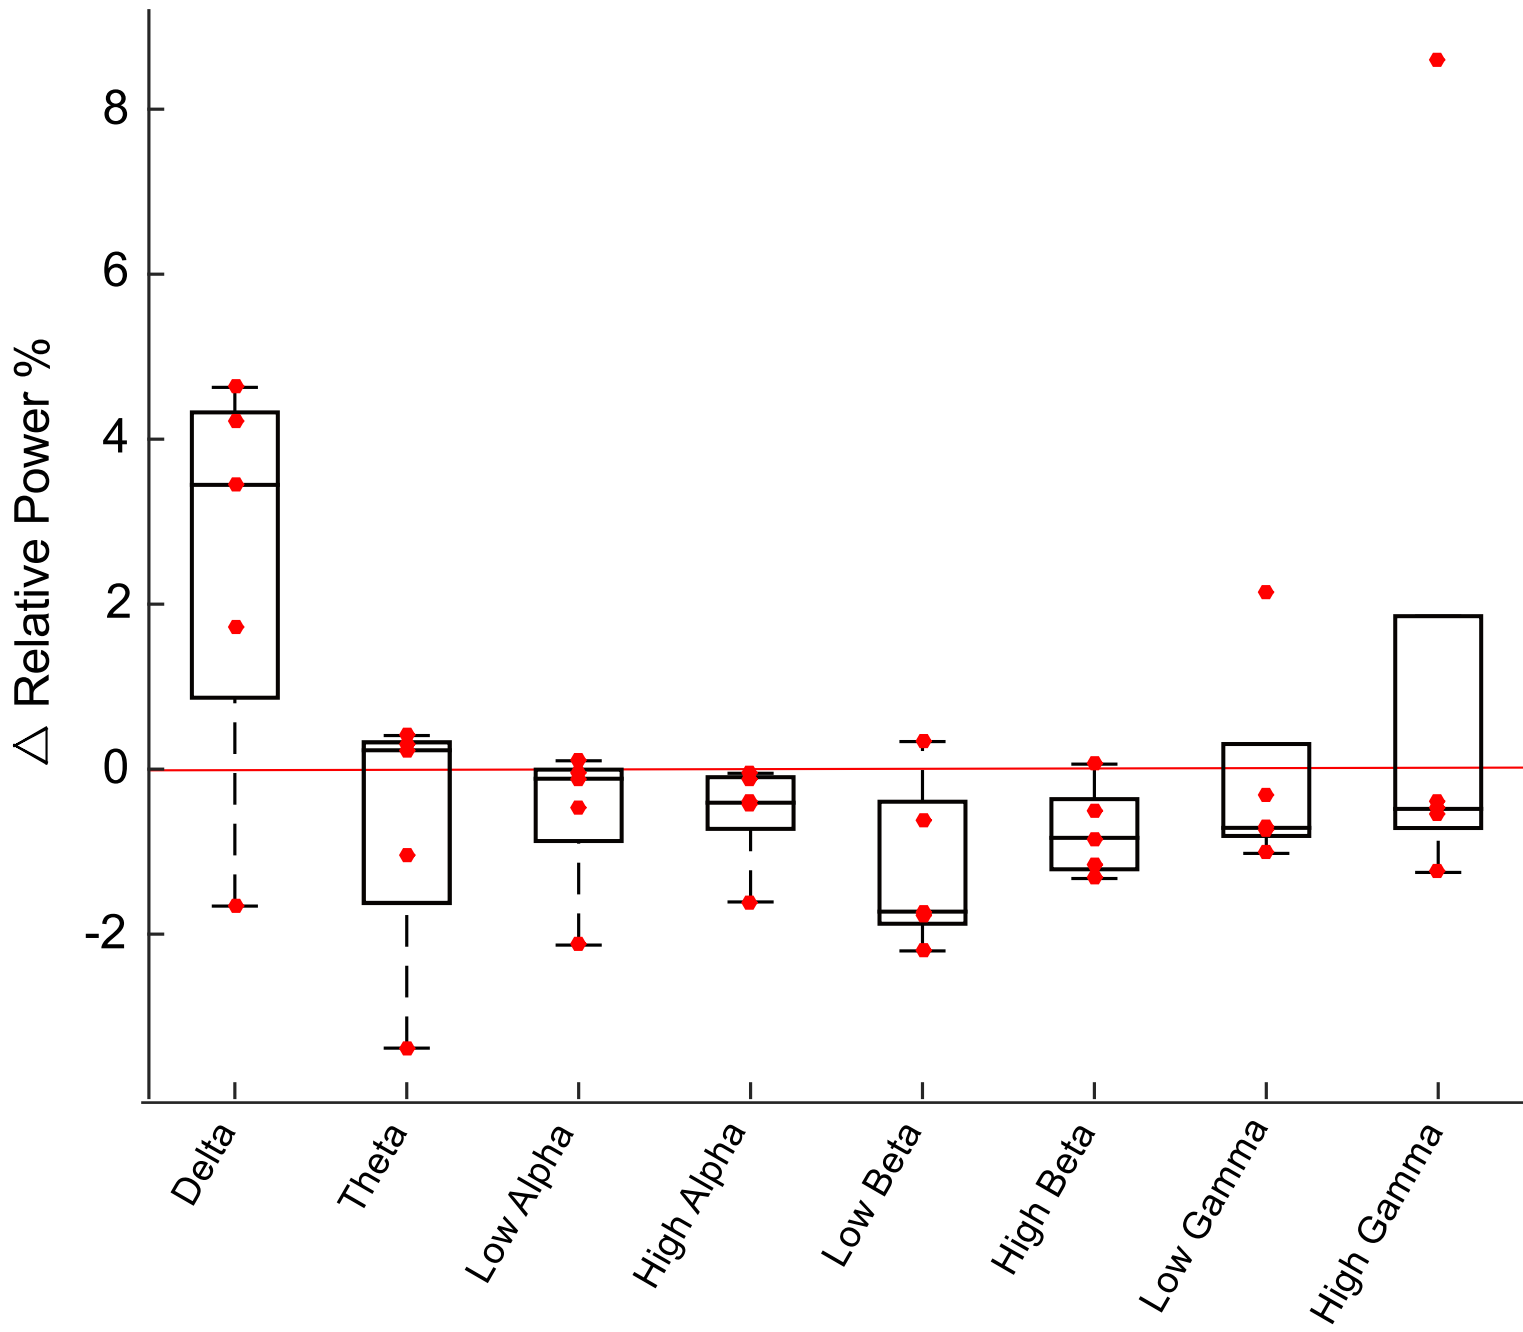

Supplement: supp [file elife_poa_e40843_Figure_5_figure_supplement_4.pdf › elife_poa_e40843_Figure_5_figure_supplement_4.pdf]
